# Supplementary material for: Confinement of Pt NPs by hollow-porous-carbon-spheres via pore regulation with promoted activity and durability in the hydrogen evolution reaction
Source: Royal Society of Chemistry journal article supplement (doi:10.1039/d1nr04982h), 2021-01-01
Supplement: d1nr04982h1.pdf [file d1nr04982h1.pdf]

## Supporting Information

### Confinement of Pt NPs by Hollow-Porous-Carbon-Sphere via Pore Regulation with Promoted Activity and Durability in Hydrogen Evolution Reaction

Zhuofan Gan,<sup>a</sup> Chengyong Shu,<sup>a</sup> Chengwei Deng,<sup>b</sup> Wei Du,<sup>b</sup> Bo Huang\*<sup>a</sup> and Wei Tang\*<sup>a</sup>

<sup>a</sup> School of Chemical Engineering and Technology, Xi'an Jiaotong University, Xi'an 710049, P. R. China Email: bohuang@xjtu.edu.cn; tangw2018@xjtu.edu.cn

<sup>b</sup> State Key Laboratory of Space Power-Sources Technology, Shanghai Institute of Space Power Sources, Shanghai, 200245, P. R. China Email: dengchengwei@spacechina.com; sispdw@sina.com

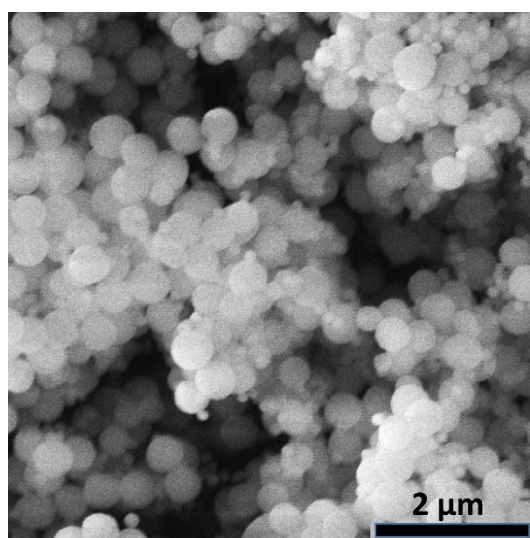

Fig. S1 The SEM image of silica spheres.

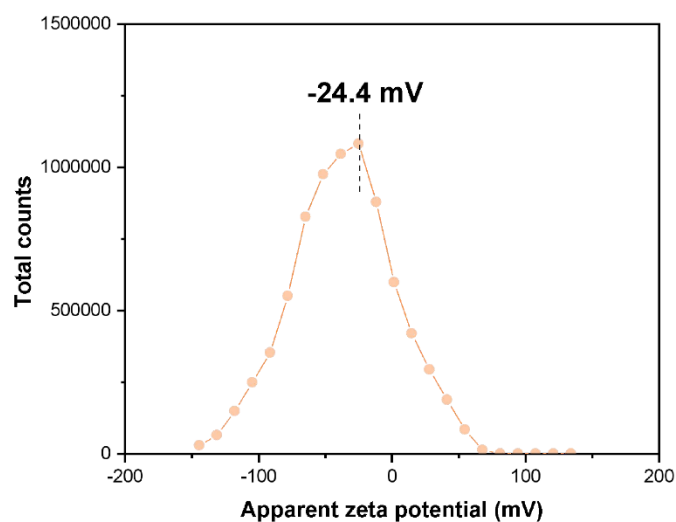

Fig. S2 Apparent zeta potential of the silica spheres in water / ethanol solution.

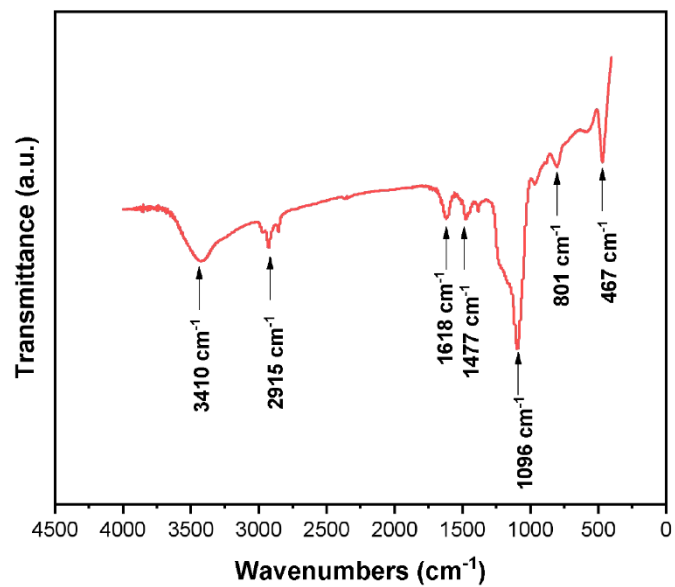

Fig. S3 FTIR spectra of the cross-link precursors.

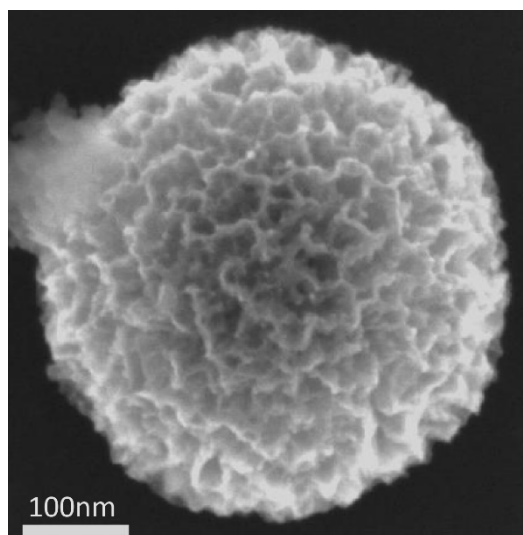

Fig. S4 The SEM image of N-HPCS obtained after 16 h of reaction.

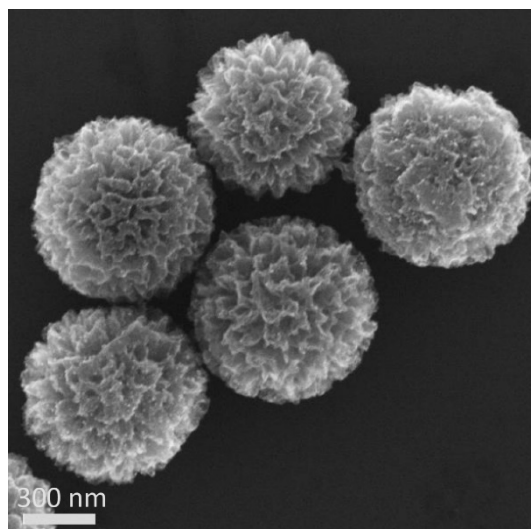

Fig. S5 The SEM image of N-HPCS-0.5.

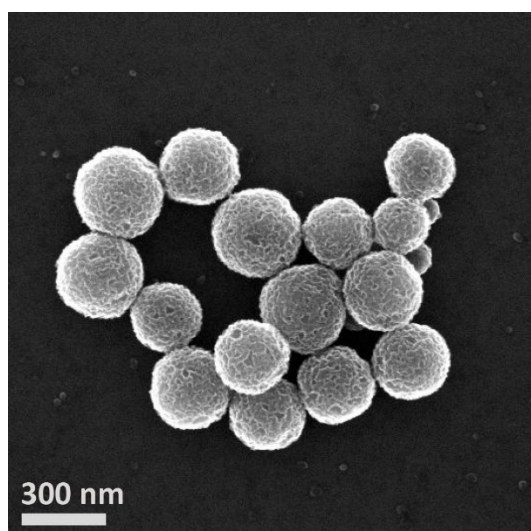

Fig. S6 The SEM image of N-HPCS-4.

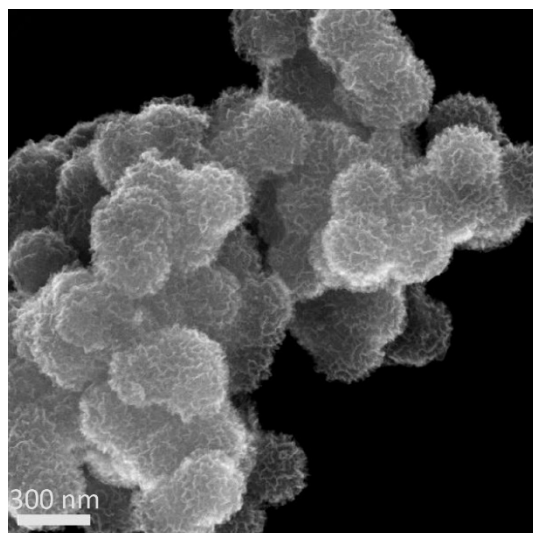

Fig. S7 The SEM image of N-HPCS-8

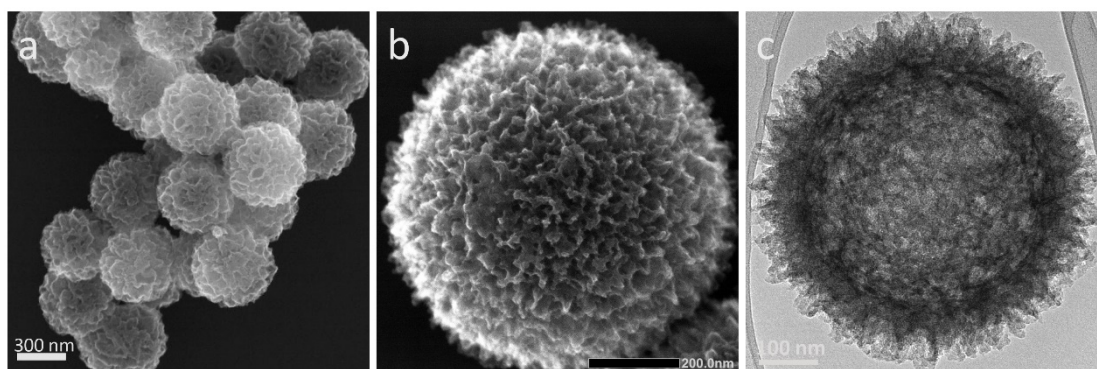

Fig. S8 The (a) SEM, (b) STEM and (c) TEM image of N-HPCS-2

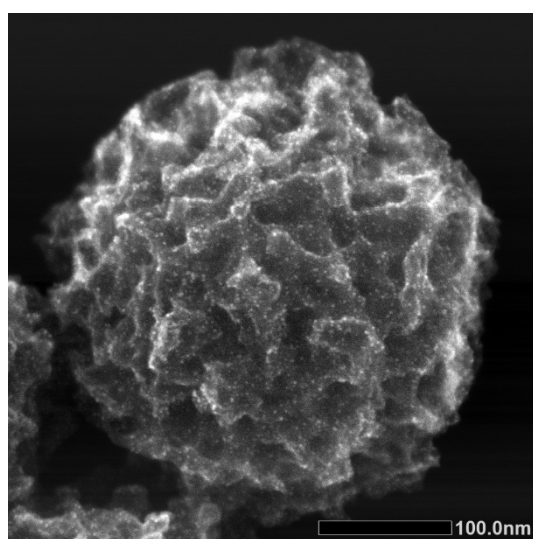

Fig. S9 The HAADF-STEM image of Pt/N-HPCS.

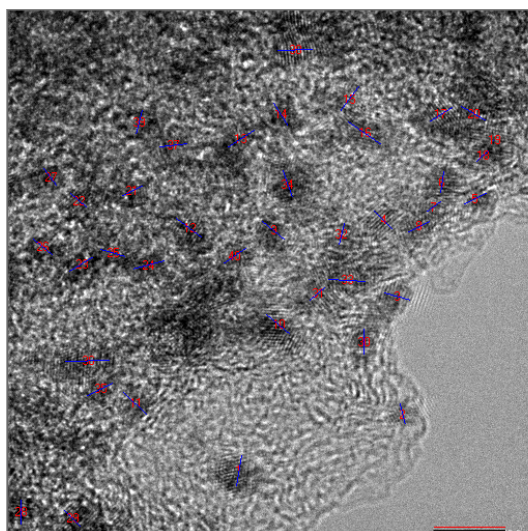

Fig. S10 Statistics of Pt NPs size on Pt/N-HPCS.

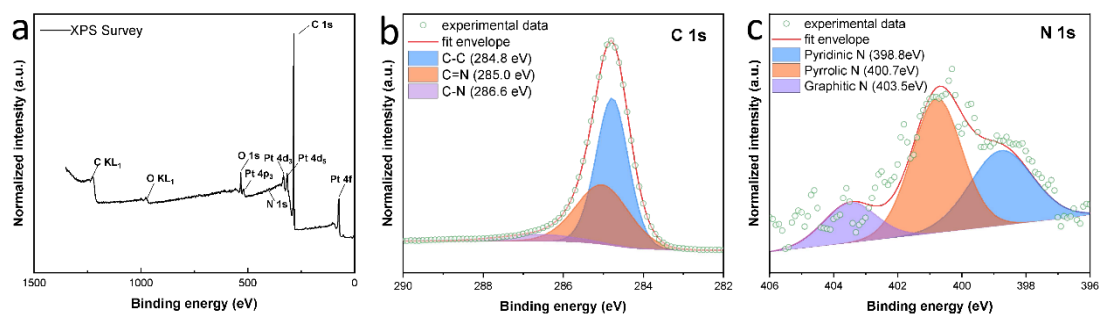

Fig. S11 (a) Surface survey XPS spectra of Pt(6.21%)/N-HPCS; (b) C 1s and (c) N 1s XPS spectra of Pt(6.21%)/N-HPCS.

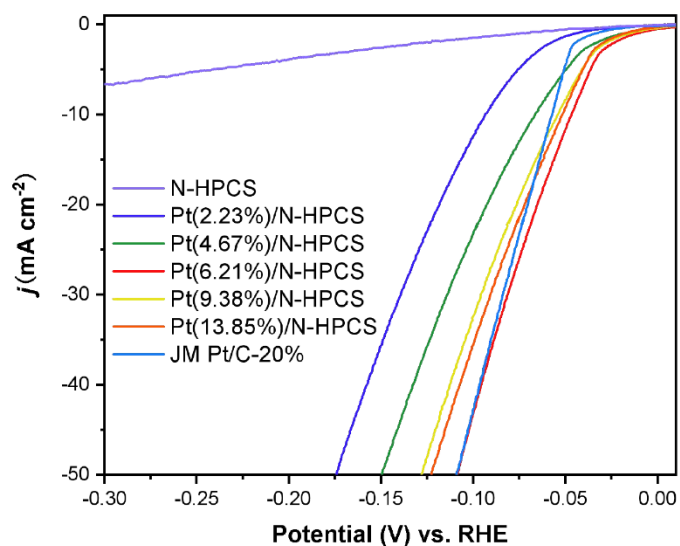

Fig. S12 LSV curves of N-HPCS, Pt/N-HPCS with different Pt loading amounts and JM Pt/C-20%.

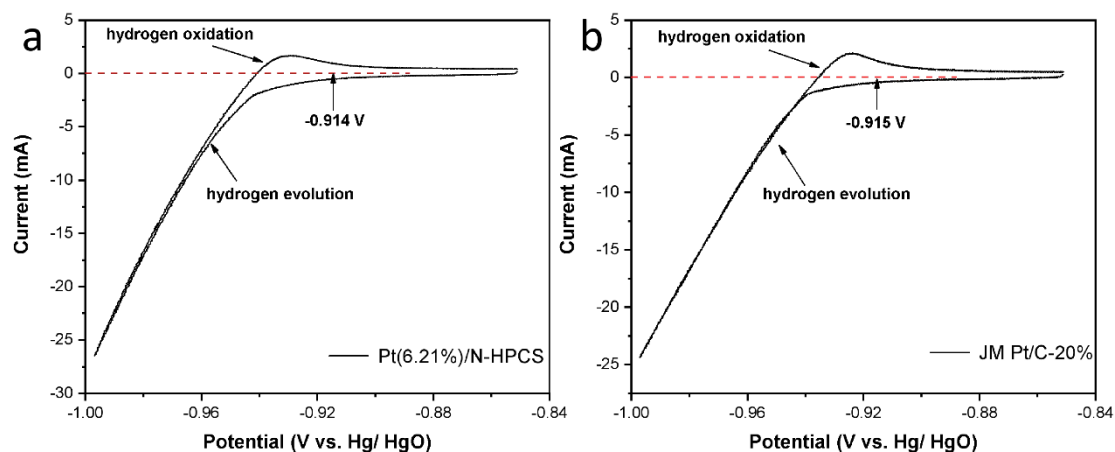

Fig. S13 The onset potentials of (a) Pt(6.21%)/N-HPCS and (b) JM Pt/C-20% in 1 M KOH solution.  $E(\text{V, vs. RHE}) = E(\text{V, vs. Hg/ HgO}) + 0.098 \text{ V} + 0.0592 \times 13.8$ . The solution was bubbled with hydrogen for 30min to get the  $\text{H}_2$ -saturated electrolyte before the test. Cyclic voltammetry (CV) was recorded at a scan rate of  $2.0 \text{ mV s}^{-1}$ . The average value of the two potentials corresponded to zero current was recognized as the onset potential of HER.

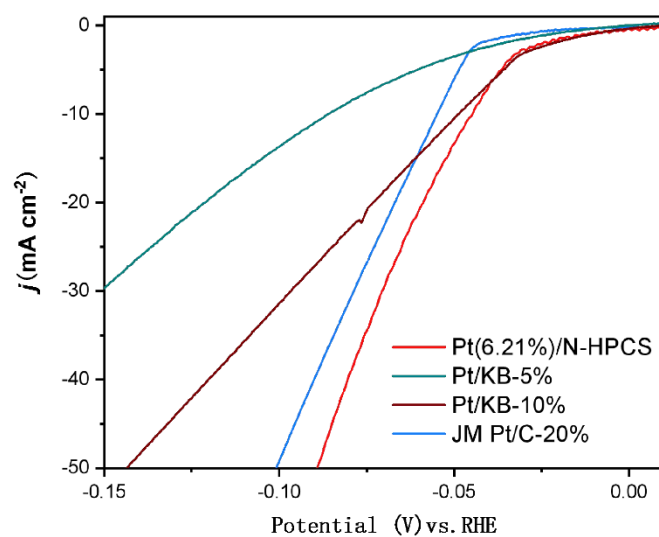

Fig. S14 LSV curves of Pt(6.21%)/N-HPCS, Pt/KB-5%, Pt/KB-10% and JM Pt/C-20% after iR-correction.



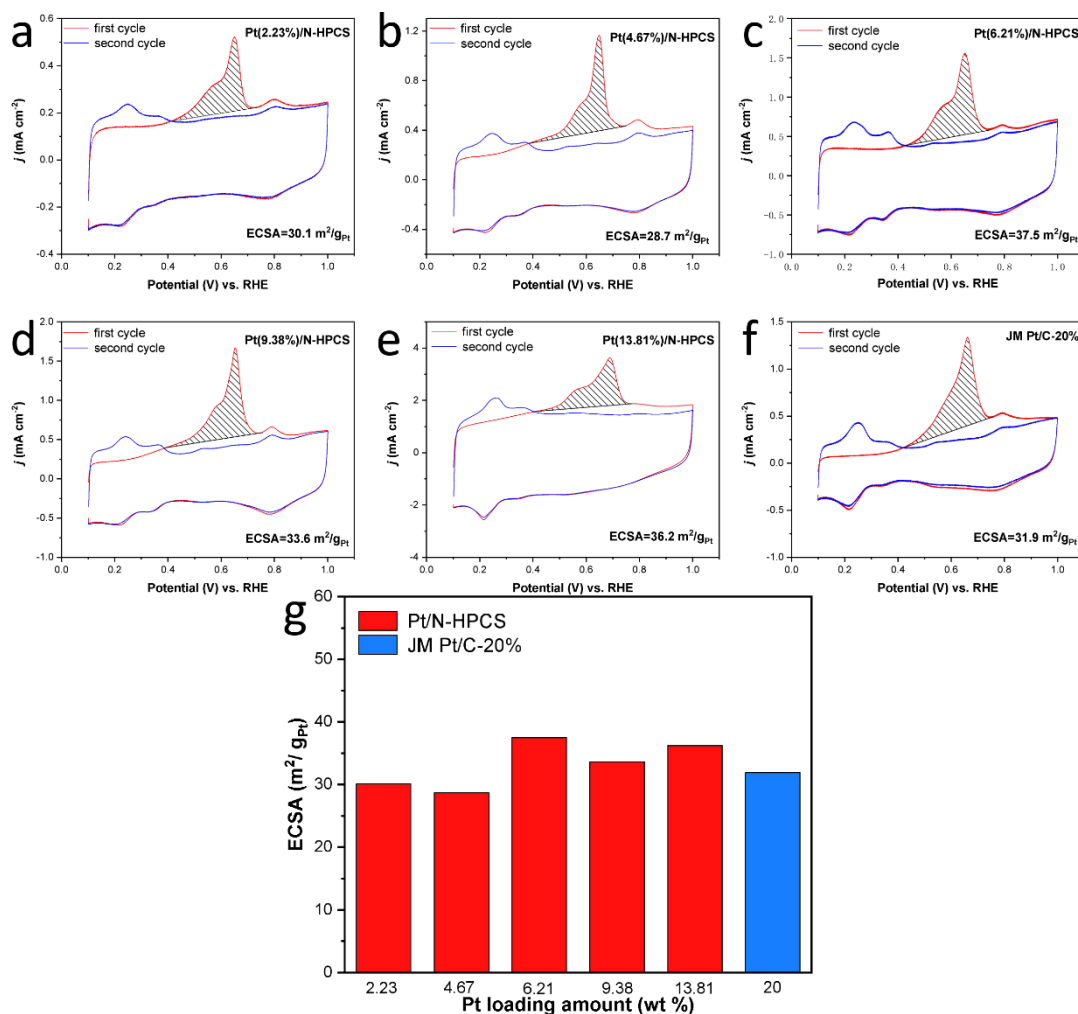

Fig. S15 CO stripping measurements of (a) Pt(2.23%)/N-HPCS, (b) Pt(4.67%)/N-HPCS, (c) Pt(6.21%)/N-HPCS, (d) Pt(9.38%)/N-HPCS, (e) Pt(13.81%)/N-HPCS and (f) JM Pt/C-20% in the solution of 1 M KOH at 20 mV s<sup>-1</sup>. (g) The ECSAs of catalysts with different Pt loadings.

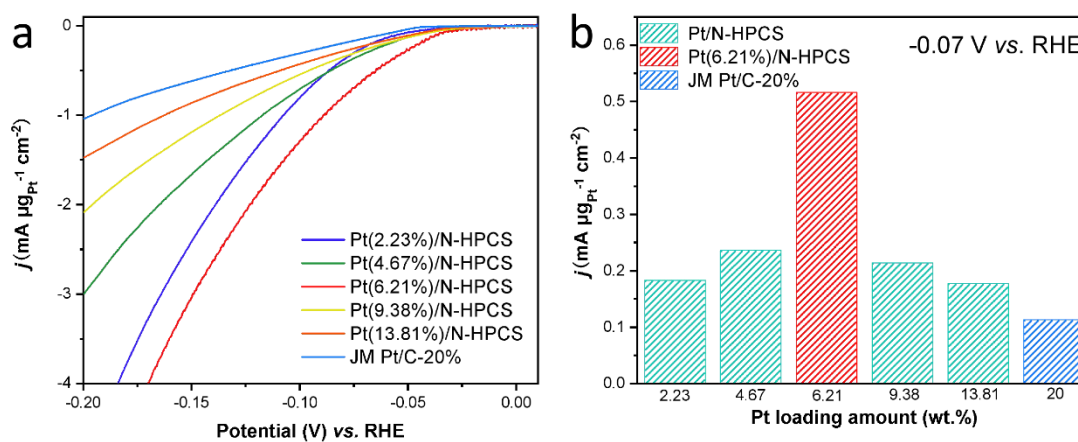

Fig. S16 (a) LSV curves of Pt/N-HPCS with different Pt loading amounts and JM Pt/C-20% based on the mass of Pt. (b) The mass activities of catalysts with different Pt loadings at -0.07 V (vs. RHE).

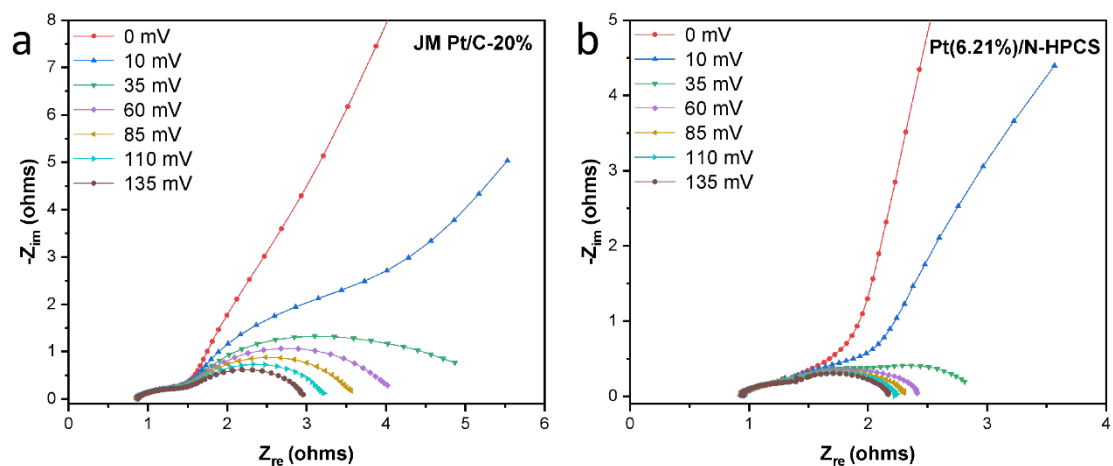

Fig. S17 Nyquist plots of (a) JM Pt/C-20% and (b) Pt(6.21%)/N-HPCS at various overpotentials. The EIS measurement was performed with a perturbation amplitude of 5 mV in the frequency range of 0.1 Hz to 100 kHz.

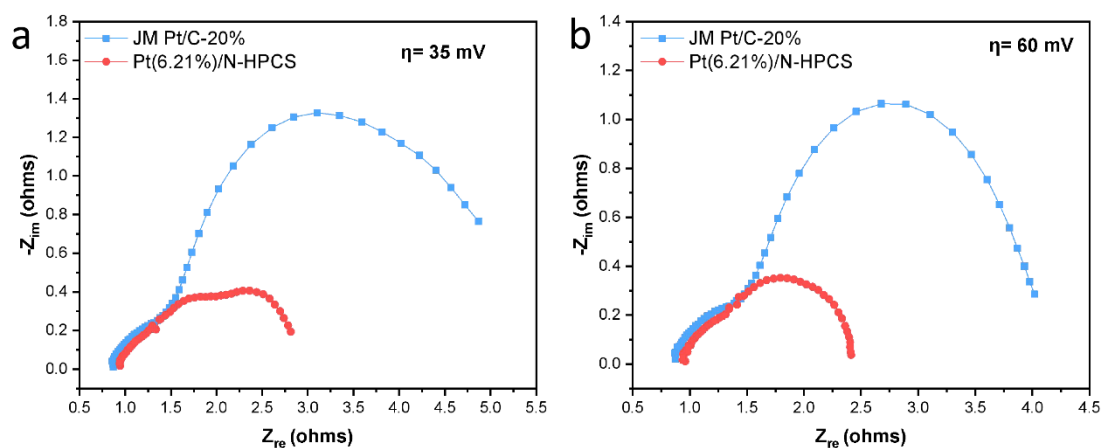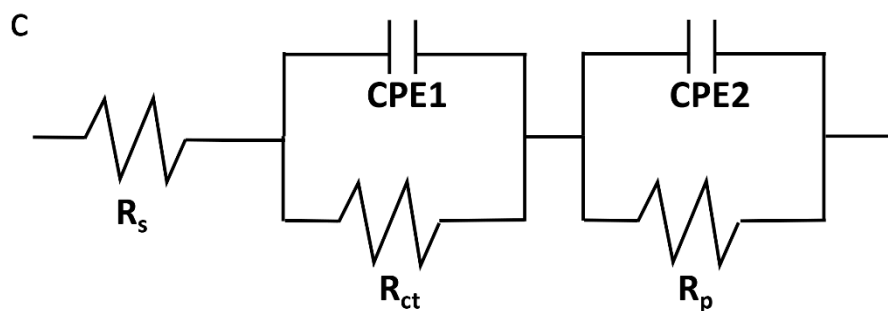

Fig. S18 Nyquist plots of JM Pt/C-20% and Pt(6.21%)/N-HPCS at overpotential of (a) 35 mV and (b) 60 mV. (c) The EIS data was simulated by equivalent electrical circuit diagram, containing of a series resistance ( $R_s$ ), two constant phase components (CPE1 and CPE2), resistance related to surface porosity ( $R_p$ ) and resistance related to charge transfer ( $R_{ct}$ ). The EIS measurement was performed with a perturbation amplitude of 5 mV in the frequency range of 0.1 Hz to 100 kHz.



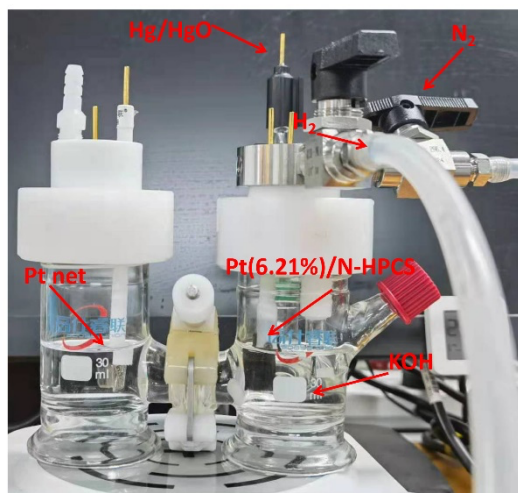

Fig. S19. The electrochemical cell for Faradaic efficiency measurement.

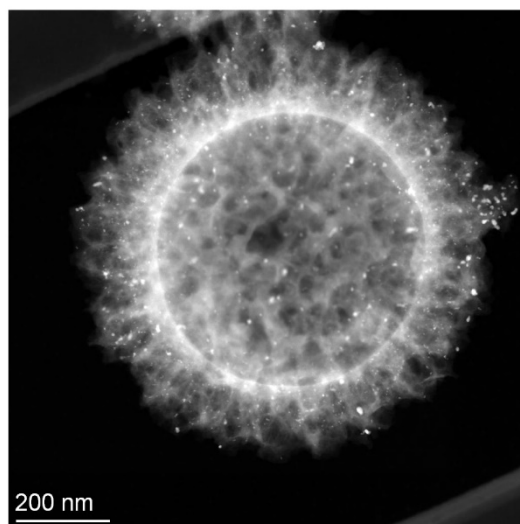

Fig. S20. The dark-field STEM image of Pt(6.21%)/N-HPCS after 60 h stability test.

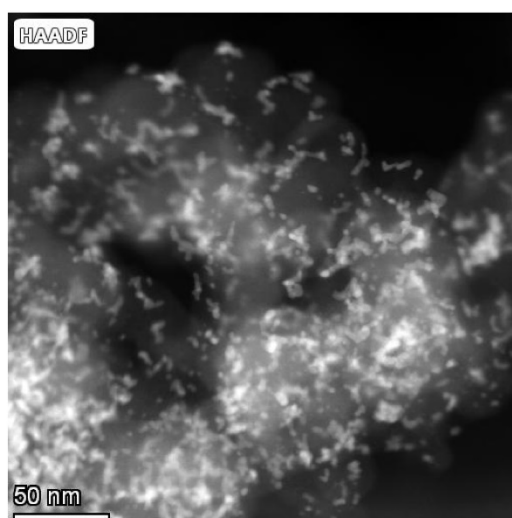

Fig. S21. The dark-field STEM image of JM Pt/C-20% after 20 h stability test.

**Table S1** Elemental analysis of N-HPCS with different CTAB contents.

| Sample     | C (wt %) | H (wt %) | N (wt %) |
|------------|----------|----------|----------|
| N-HPCS-0.5 | 87.17    | 0.423    | 0.38     |
| N-HPCS-1   | 72.97    | 1.793    | 1.52     |
| N-HPCS-2   | 80.79    | 1.786    | 1.31     |
| N-HPCS-4   | 72.75    | 2.377    | 1.08     |
| N-HPCS-8   | 72.7     | 2.338    | 1.13     |

**Table S2** BET specific surface areas of N-HPCS with different CTAB contents.

| Sample     | Dosage of CTAB (g) | BET surface area (m <sup>2</sup> g <sup>-1</sup> ) |
|------------|--------------------|----------------------------------------------------|
| N-HPCS-0.5 | 0.5                | 395.2                                              |
| N-HPCS-1   | 1                  | 740.9                                              |
| N-HPCS-2   | 2                  | 900.2                                              |
| N-HPCS-4   | 4                  | 638.2                                              |
| N-HPCS-8   | 8                  | 764.5                                              |

**Table S3** ICP results of Pt contents in Pt/N-HPCS.

| Sample            | Pt contents (wt %) |
|-------------------|--------------------|
| Pt(2.23%)/N-HPCS  | 2.23               |
| Pt(4.67%)/N-HPCS  | 4.67               |
| Pt(6.21%)/N-HPCS  | 6.21               |
| Pt(9.38%)/N-HPCS  | 9.38               |
| Pt(13.81%)/N-HPCS | 13.81              |

**Table S4** Information about the electrochemical test in 1M KOH electrolyte.

| Sample            | Carbon paper       | Catalyst loading<br>(mg) | Pt loading ( $\mu$ g) | Overpotential<br>at 10 mA/cm <sup>2</sup> (mV) |
|-------------------|--------------------|--------------------------|-----------------------|------------------------------------------------|
| Pt(2.23%)/N-HPCS  | 1 cm $\times$ 1 cm | 0.8                      | 17.84                 | 89.54                                          |
| Pt(4.67%)/N-HPCS  | 1 cm $\times$ 1 cm | 0.8                      | 37.36                 | 66.54                                          |
| Pt(6.21%)/N-HPCS  | 1 cm $\times$ 1 cm | 0.8                      | 49.68                 | 44.79                                          |
| Pt(9.38%)/N-HPCS  | 1 cm $\times$ 1 cm | 0.8                      | 75.04                 | 50.54                                          |
| Pt(13.81%)/N-HPCS | 1 cm $\times$ 1 cm | 0.8                      | 110.48                | 46.54                                          |
| JM Pt/C-20%       | 1 cm $\times$ 1 cm | 0.8                      | 160.00                | 55.04                                          |
| Pt/KB-5%          | 1 cm $\times$ 1 cm | 0.8                      | 40.00                 | 86.25                                          |
| Pt/KB-10%         | 1 cm $\times$ 1 cm | 0.8                      | 80.00                 | 49.08                                          |

**Table S5** Comparison of the HER performance of Pt NP catalysts in alkaline electrolyte.

| Materials                             | Mass loading                            | Electrolyte                  | Overpotential<br>at 10 mA/cm <sup>2</sup><br>(mV) | Tafel<br>slope<br>(mV/dec) | Ref.      |
|---------------------------------------|-----------------------------------------|------------------------------|---------------------------------------------------|----------------------------|-----------|
| Pt(6.21%)/N-HPCS                      | 0.8 mg cm <sup>-2</sup>                 | 1 M KOH                      | 45                                                | 22.4                       | this work |
| JM Pt/C-20%                           | 0.8 mg cm <sup>-2</sup>                 | 1 M KOH                      | 55                                                | 27.5                       | this work |
| Pt-NP/NiO-NS<br>nanohybrids           | 0.1 mg cm <sup>-2</sup>                 | 1 M KOH with<br>1 M methanol | 57                                                | 59.06                      | [1]       |
| BC <sub>3</sub> N@Pt                  | /                                       | 1 M KOH                      | 26.1                                              | 41.59                      | [2]       |
| Pt/LiCoO <sub>2</sub>                 | 0.204 mg cm <sup>-2</sup>               | 1 M KOH                      | 61                                                | 39.5                       | [3]       |
| Pt@CoS <sub>2</sub> -NrGO             | 3.0 mg cm <sup>-2</sup>                 | 1 M KOH                      | 39                                                | 35                         | [4]       |
| Pt/Ni(HCO <sub>3</sub> ) <sub>2</sub> | /                                       | 1 M KOH                      | 27                                                | 52                         | [5]       |
| BP <sub>ed</sub> -Pt/GR               | 14.28 μg <sub>Pt</sub> cm <sup>-2</sup> | 1 M KOH                      | 21                                                | 46.9                       | [6]       |
| Ni <sub>0.5</sub> -NCNFs-Pt           | 0.28 mg cm <sup>-2</sup>                | 1 M KOH                      | 47                                                | 31                         | [7]       |
| 3ZIF-67-<br>Pt/RGO                    | 20 μg <sub>Pt</sub> cm <sup>-2</sup>    | 1 M KOH                      | 37.2                                              | 33.1                       | [8]       |
| Pt-Ni(OH) <sub>2</sub> -2h-<br>NF20   | 20 μg <sub>Pt</sub> cm <sup>-2</sup>    | 1 M KOH                      | 85                                                | 28                         | [9]       |

**Table S6** TOF values of Pt(6.21%)/N-HPCS and JM Pt/C-20% in 1 M KOH.

| Catalysts        | Overpotential (mV vs. RHE) | TOF (H <sub>2</sub> s <sup>-1</sup> ) |
|------------------|----------------------------|---------------------------------------|
| Pt(6.21%)/N-HPCS | 100                        | 1.263                                 |
|                  | 200                        | 5.370                                 |
| JM Pt/C-20%      | 100                        | 0.310                                 |
|                  | 200                        | 1.055                                 |

## References

- G. Ma, X. Zhang, G. Zhou and X. Wang, *Chem. Eng. J.*, 2021, **411**, 128292.
- X. Zhao, M. Zheng, Z. Zhang, Y. Wang, Y. Zhou, X. Zhou and H. Zhang, *J. Mater. Chem. A*, 2021, DOI: 10.1039/d1ta04142h.
- X. Zheng, P. Cui, Y. Qian, G. Zhao, X. Zheng, X. Xu, Z. Cheng, Y. Liu, S. X. Dou and W. Sun, *Angew. Chem., Int. Ed.*, 2020, **59**, 14533-14540.
- N. Logeshwaran, S. Ramakrishnan, S. S. Chandrasekaran, M. Vinothkannan, A. R. Kim, S. Sengodan, D. B. Velusamy, P. Varadhan, J.-H. He and D. J. Yoo, *Appl. Catal., B*, 2021, **297**, 120405.
- M. Lao, K. Rui, G. Zhao, P. Cui, X. Zheng, S. X. Dou and W. Sun, *Angew. Chem., Int. Ed.*, 2019, **58**, 5432-5437.
- X. Wang, L. Bai, J. Lu, X. Zhang, D. Liu, H. Yang, J. Wang, P. K. Chu, S. Ramakrishna and X.-F. Yu, *Angew. Chem., Int. Ed.*, 2019, **58**, 19060-19066.
- M. Li, Y. Zhu, N. Song, C. Wang and X. Lu, *J. Colloid Interface Sci.*, 2018, **514**, 199-207.

- 8 W. Wu, Z. Zhang, Z. Lei, X. Wang, Y. Tan, N. Cheng and X. Sun, *ACS Appl. Mater. Interfaces*, 2020, **12**, 10359-10368.
- 9 Q. Liu, Z. Yan, J. Gao, E. Wang and G. Sun, *ACS Appl. Mater. Interfaces*, 2020, **12**, 24683-24692.
